# Supplementary material for: Direct and efficient transfection of mouse neural stem cells and mature neurons by in vivo mRNA electroporation
Source: Oxford University Press journal article supplement (doi:10.1242/dev.151381), 2017-01-01
Supplement: dev151381supp.pdf [file dev151381supp.pdf]

Supplementary Figure 1

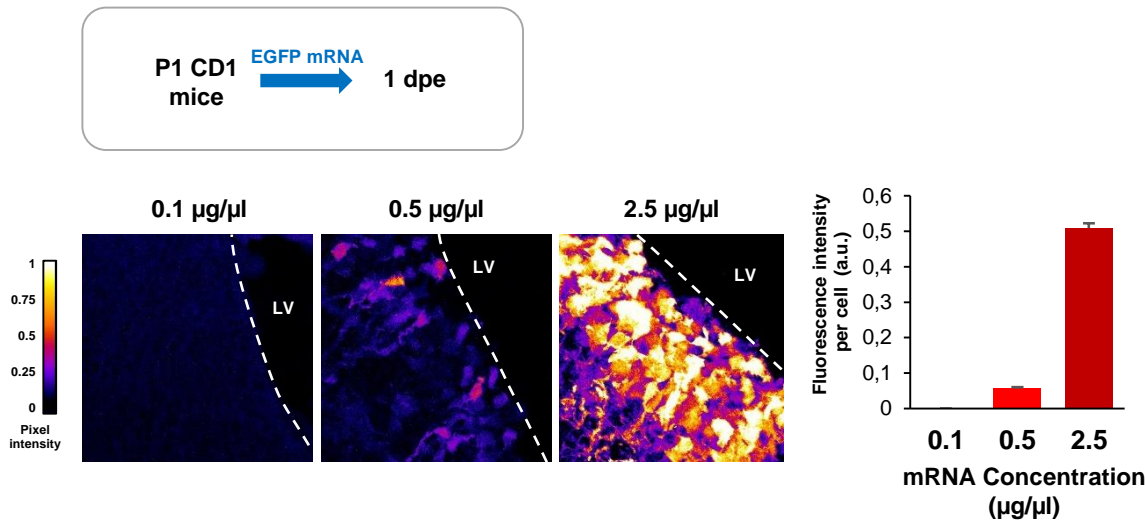

P1 CD1 mice were electroporated with EGFP mRNA at different concentrations: 0.1µg/µl, 0.5µg/µl and 2.5µg/µl. At 1 dpe, mice were sacrificed and the fluorescence intensity per individual SVZ cells was measured. No cells could be detected at 0.1µg/µl, while we observed a dose-dependent increase of fluorescence intensity between 0.5 and 2.5µg/µl. EGFP at 0.5µg/µl: 0.056±0.004, EGFP at 2.5µg/µl: 0.509±0.014 a.u., N = 3 animals and at least 170 cells. Data are represented as mean±s.e.m.

Supplementary Figure 2

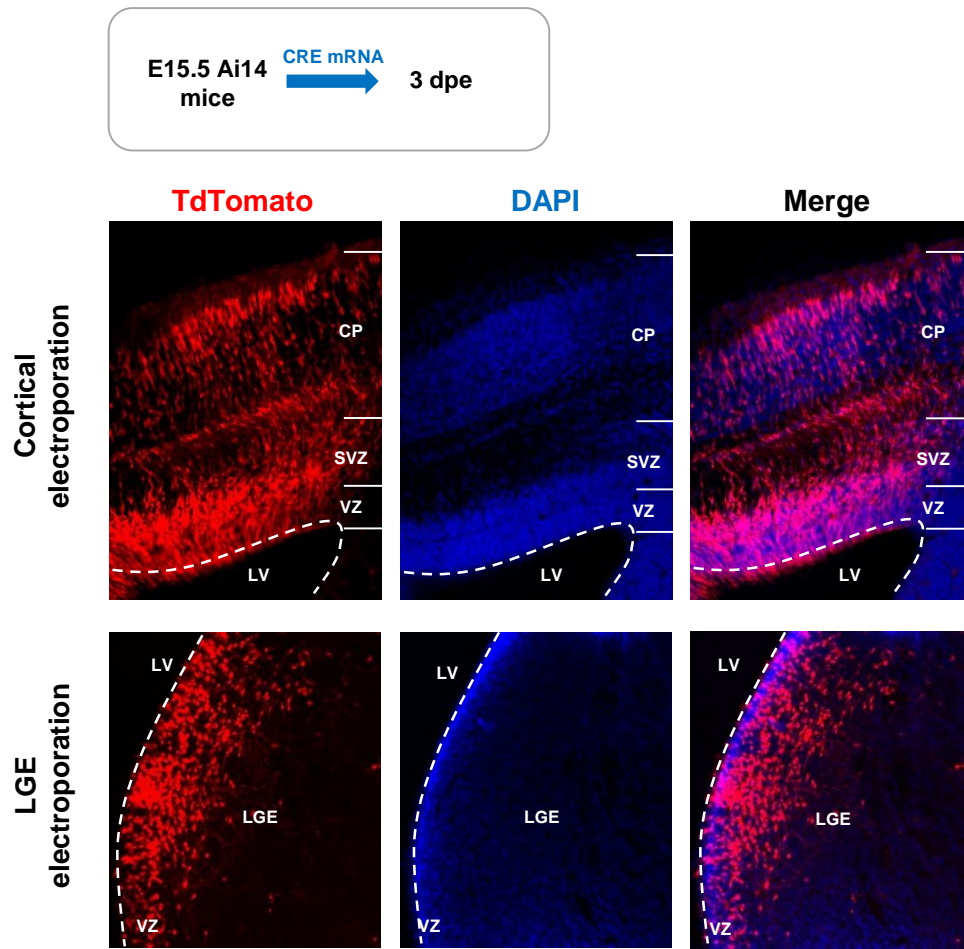

Embryos from an E15.5 time pregnant Ai14 mice were electroporated with CRE mRNA targeting either the dorsal side (cortical electroporation) or the lateral side (LGE electroporation). Transfection efficiency was very high, showing the ability of mRNA electroporation to target neural stem cells in the embryonic brain.
